# Supplementary material for: New sensing platform of poly(ester-urethane)urea doped with gold nanoparticles for rapid detection of mercury ions in fish tissue
Source: Royal Society of Chemistry journal article supplement (doi:10.1039/d1ra03693a), 2021-01-01
Supplement: d1ra03693a1.pdf [file d1ra03693a1.pdf]

## New sensing platform of poly(ester-urethane) urea doped with gold nanoparticles for rapid detection of mercury ions in fish tissue

Hany Abd El-Raheem<sup>1,3</sup>, Rabeay Y. A. Hassan<sup>1,2\*</sup>, Rehab Khaled<sup>4</sup>, Ahmed Farghali<sup>3</sup>, Ibrahim M. El-Sherbiny<sup>1\*</sup>

<sup>1</sup>Center of Materials Sciences, Zewail City of Science and Technology, October Gardens, 6th of October City, 12578, Giza, Egypt; <sup>2</sup>Applied Organic Chemistry Department, National Research Centre (NRC), Dokki, 12622, Giza, Egypt; <sup>3</sup>Materials Science and Nanotechnology Department, Faculty of Postgraduate Studies for Advanced Sciences, Beni-Suef University, Beni-Suef, Egypt; <sup>4</sup>Chemistry Department, Faculty of Science, Beni-Suef University, Beni-Suef, Egypt.

### \*Corresponding author:

Prof. Ibrahim M. El-Sherbiny,  
Center of Materials Sciences,  
Zewail City of Science and Technology,  
October Gardens, 6th of October City, 12578, Giza, Egypt  
Email: [ielsherbiny@zewailcity.edu.eg](mailto:ielsherbiny@zewailcity.edu.eg)

### \*Corresponding author:

Dr. Rabeay Y. A. Hassan, PhD  
Zewail City of Science and Technology,  
October Gardens, 6th of October City, 12578, Giza, Egypt  
Email: [ryounes@zewailcity.edu.eg](mailto:ryounes@zewailcity.edu.eg)

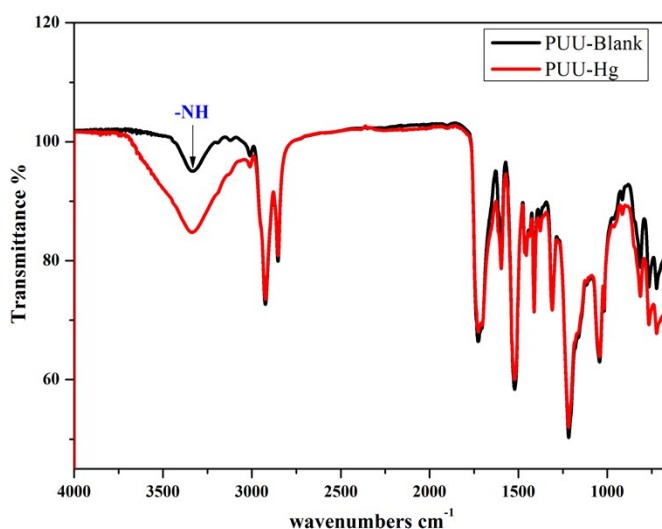

**Figure-S1:** FTIR spectra of PUU (black) before and after (red) interaction with mercury ion

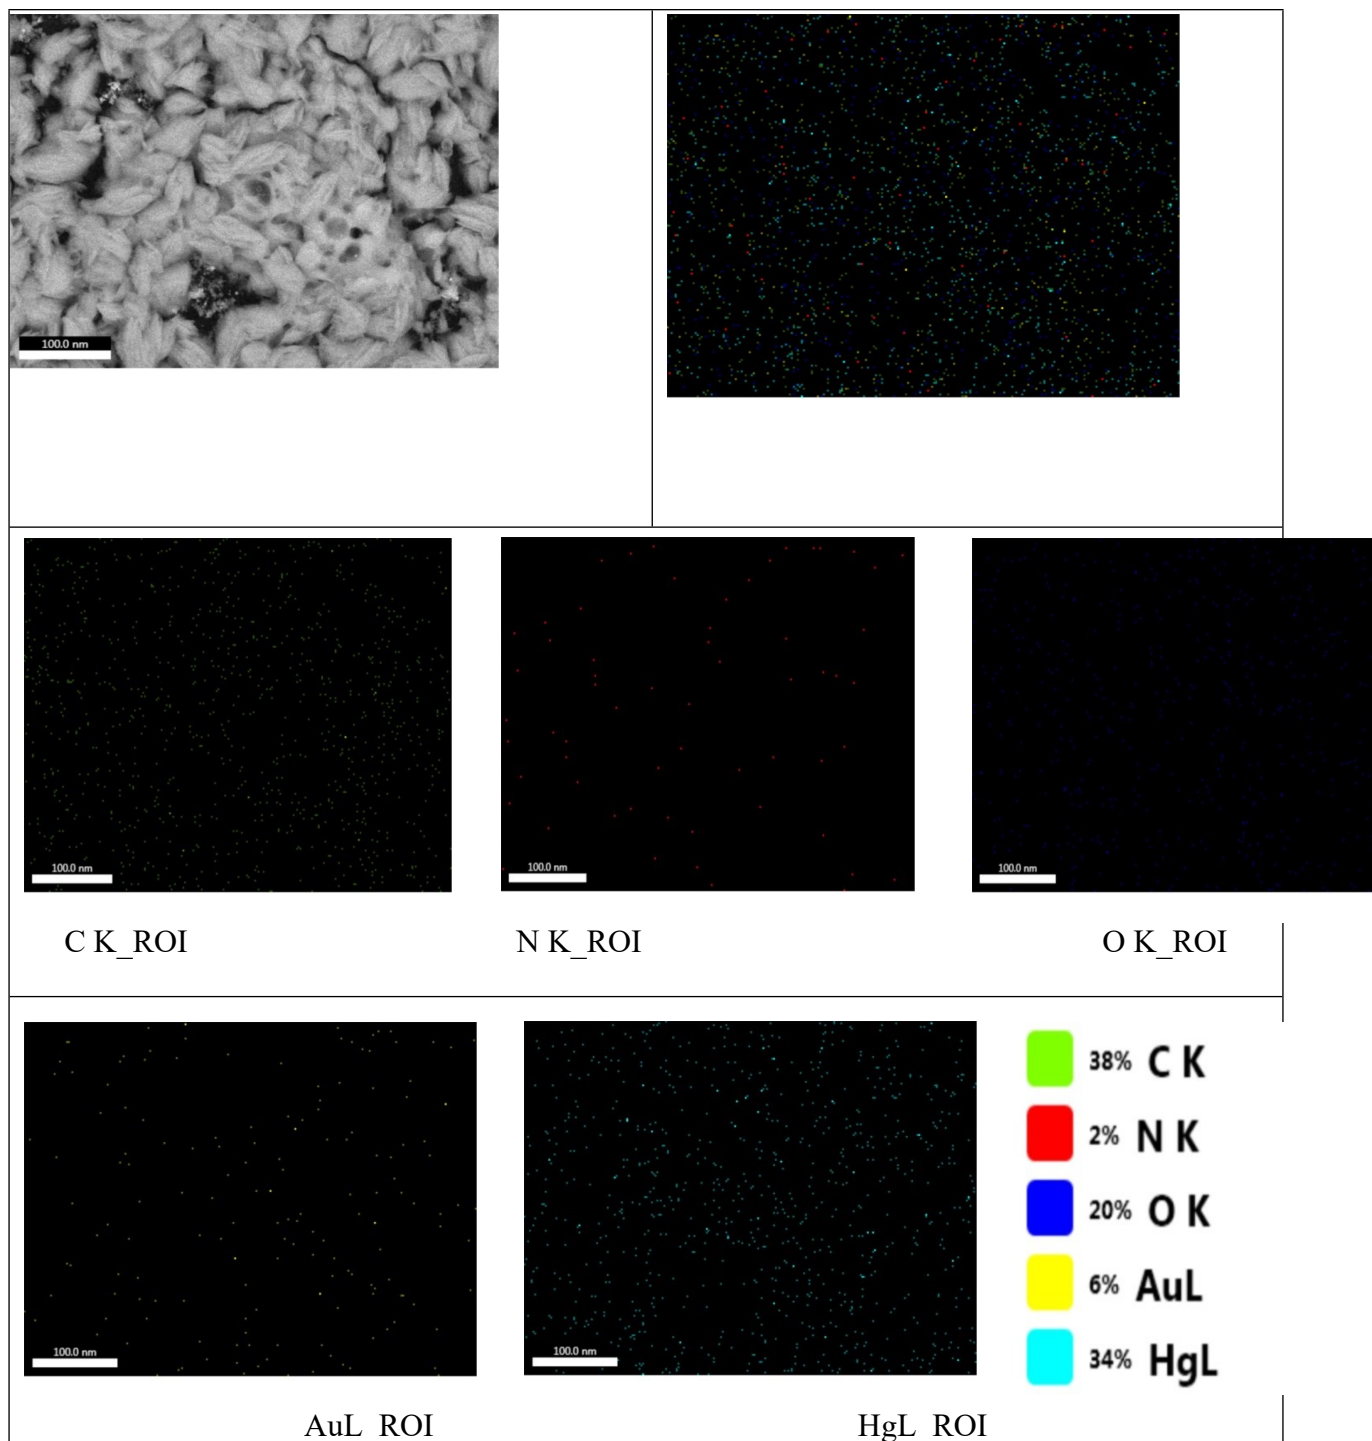

**Figure-S2A:** SEM-EDS mapping images of (Hg, Au, C, N, and O)

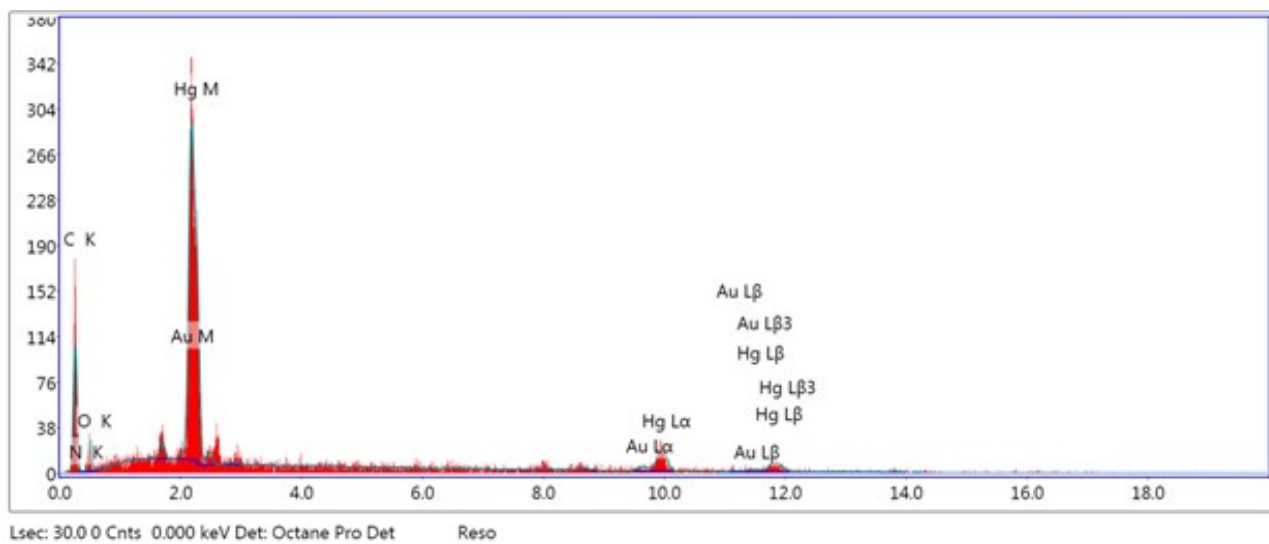

**Figure-S2B:** EDX spectra of (Hg, Au, C, N, and O)
